# Supplementary material
Source: ML conference proceedings conference paper supplement (https://openreview.net/forum?id=PSngfm5B9q)
Supplement: supplementary_material [file attachment]

## A Detailed Explanation of $k$ -peer Hyperhypercube Graph

In this section, we explain Alg. 1 in more detail. The  $k$ -PEER HYPER-HYPERCUBE GRAPH mainly consists of the following five steps.

- Step 1.** Decompose  $n$  as  $n = n_1 \times \cdots \times n_L$  with minimum  $L$  such that  $n_l \in [k + 1]$  for all  $l \in [L]$ .
- Step 2.** If  $L = 1$ , we make all nodes obtain the average of parameters in  $V$  by using the complete graph. If  $L \geq 2$ , we split  $V$  into disjoint subsets  $V_1, \cdots, V_{n_L}$  such that  $|V_l| = \frac{n}{n_L}$  for all  $l \in [n_L]$  and continue to step 3.
- Step 3.** For all  $l \in [n_L]$ , we make all nodes in  $V_l$  obtain the average of parameters in  $V_l$  by using the  $k$ -PEER HYPER-HYPERCUBE GRAPH  $\mathcal{H}_k(V_l)$ .
- Step 4.** We take  $n_L$  nodes from  $V_1, \cdots, V_{n_L}$  respectively and construct a set  $U_1$ . Similarly, we construct  $U_2, \cdots, U_{n_L}$  such that  $U_1, \cdots, U_{n_L}$  are disjoint sets.
- Step 5.** For all  $l \in [n_L]$ , we make all nodes in  $U_l$  obtain the average of parameters in  $U_l$  by using the complete graph. Because the average of parameter  $U_l$  is equivalent to the average in  $V$  after step 4, all nodes reach the exact consensus.

When  $n \leq k + 1$ , the  $k$ -PEER HYPER-HYPERCUBE GRAPH becomes the complete graph because of step 2. When  $n > k + 1$ , we decompose  $n$  in step 1 and construct the  $k$ -PEER HYPER-HYPERCUBE GRAPH recursively in step 3. Thus, the  $k$ -PEER HYPER-HYPERCUBE GRAPH can make all nodes reach the exact consensus by the sequence of  $L$  graphs.

Using the example provided in Fig. 10, we explain the  $k$ -PEER HYPER-HYPERCUBE GRAPH in a more detailed manner. When  $n = 12$ , we decompose 12 as  $2 \times 2 \times 3$ . In step 2, we split  $V := \{1, \cdots, 12\}$  into  $V_1 := \{1, \cdots, 4\}$ ,  $V_2 := \{5, \cdots, 8\}$ , and  $V_3 := \{9, \cdots, 12\}$ . Step 3 corresponds to the first two graphs in Fig. 10b. As shown in Fig. 10a, the subgraphs consisting of  $V_1$ ,  $V_2$ , and  $V_3$  in the first two graphs in Fig. 10b are equivalent to the  $k$ -PEER HYPER-HYPERCUBE GRAPH with the number of nodes 4. Thus, all nodes reach the exact consensus by exchanging parameters in Fig. 10b.

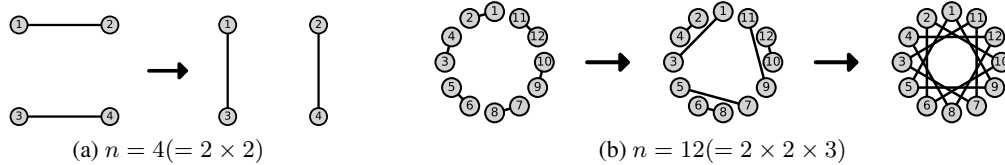

Figure 10: Illustration of the 2-PEER HYPER-HYPERCUBE GRAPH. In Fig. 10a, all edge weights are  $\frac{1}{2}$ . In Fig. 10b, edge weights are  $\frac{1}{2}$  in the first two graphs and  $\frac{1}{3}$  in the last graph.

## B Detailed Explanation of Simple Base- $(k + 1)$ Graph with $k \geq 2$

In Sec. 4.2, we explain Alg. 2 only in the case where maximum degree  $k$  is one. In this section, we explain the details of Alg. 2 in the case with  $k \geq 2$ .

The SIMPLE BASE- $(k + 1)$  GRAPH mainly consists of the following five steps.

- Step 1.** As in the base- $(k + 1)$  number of  $n$ , we decompose  $n$  as  $n = a_1(k + 1)^{p_1} + \dots + a_L(k + 1)^{p_L}$  in line 1, and then split  $V$  into disjoint subsets  $V_1, \dots, V_L$  such that  $|V_l| = a_l(k + 1)^{p_l}$  for all  $l \in [L]$ .
- Step 2.** For all  $l \in [L]$ , we split  $V_l$  into disjoint subsets  $V_{l,1}, \dots, V_{l,a_l}$  such that  $|V_{l,a}| = (k + 1)^{p_l}$  for all  $a \in [a_l]$  in line 3.
- Step 3.** For all  $l \in [L]$ , we make all nodes in  $V_l$  obtain the average of parameters in  $V_l$  using the  $k$ -PEER HYPER-HYPERCUBE GRAPH  $\mathcal{H}_k(V_l)$  in line 11. Then, we initialize  $l'$  as one.
- Step 4.** Each node in  $V_{l'+1} \cup \dots \cup V_L$  exchange parameters with  $a_{l'}$  nodes in  $V_{l'} (= V_{l',1} \cup \dots \cup V_{l',a_{l'}})$  such that the average in  $V_{l',a}$  becomes equivalent to the average in  $V$  for all  $a \in [a_{l'}]$ . We increase  $l'$  by one and repeat step 4 until  $l' = L$ . This procedure corresponds to line 15.
- Step 5.** For all  $l \in [L]$  and  $a \in [a_l]$ , we make all nodes in  $V_{l,a}$  obtain the average in  $V_{l,a}$  using the  $k$ -PEER HYPER-HYPERCUBE GRAPH  $\mathcal{H}_k(V_{l,a})$ . Since the average in  $V_{l,a}$  is equivalent to the average in  $V$  after step 4, all nodes reach the exact consensus. This procedure corresponds to line 25.

The major difference compared with the case where  $k = 1$  is step 4. In the case where  $k = 1$ , each node in  $V_{l'+1} \cup \dots \cup V_L$  exchange parameters with one node in  $V_{l'}$  such that the average in  $V_{l'}$  becomes equivalent to that in  $V$ , while in the case where  $k \geq 2$ , each node in  $V_{l'+1} \cup \dots \cup V_L$  exchange parameters such that the average in  $V_{l',a}$  becomes equivalent to that in  $V$  for all  $a \in [a_{l'}]$ . Thanks to this step, we can make all nodes reach the exact consensus using  $k$ -PEER HYPER-HYPERCUBE GRAPH  $\mathcal{H}_k(V_{l,a})$  instead of  $\mathcal{H}_k(V_l)$  in step 5, and we can reduce the length of a graph sequence.

Using the example provided in Fig. 11, we explain Alg. 2 in a more detailed manner. Let  $G^{(1)}, \dots, G^{(4)}$  denote the graphs depicted in Fig. 11 from left to right, respectively. First, we split  $V := \{1, \dots, 7\}$  into  $V_1 := \{1, \dots, 6\}$  and  $V_2 := \{7\}$ , and then split  $V_1$  into  $V_{1,1} := \{1, 2, 3\}$  and  $V_{1,2} := \{4, 5, 6\}$ . In step 3, all nodes in  $V_1$  obtain the same parameter by exchanging parameters in  $G^{(1)}$  and  $G^{(2)}$ . In step 4, the average in  $V_{1,1}$ , that in  $V_{1,2}$ , and that in  $V_2$  become the same as the average in all nodes  $V$  by exchanging parameters in  $G^{(3)}$ . Thus, in step 5, all nodes reach the exact consensus by exchanging parameters in  $G^{(4)}$ .

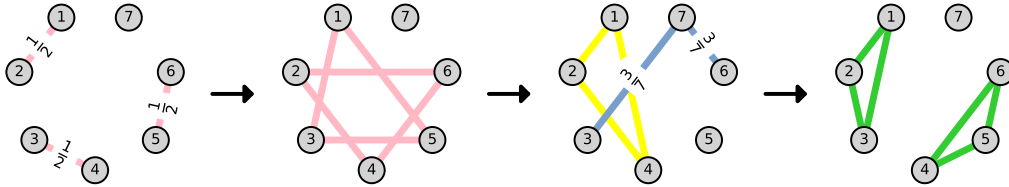

Figure 11:  $k = 2, n = 7 (= 2 \times 3 + 1)$ . The value on the edge indicates the edge weight. For simplicity, we omit the edge value when it is  $\frac{1}{3}$ .

## C Illustration of Topologies

### C.1 Examples

Fig. 12 shows the examples of the SIMPLE BASE- $(k + 1)$  GRAPH. Using these examples, we explain how all nodes reach the exact consensus.

We explain the case depicted in Fig. 12a. Let  $G^{(1)}, G^{(2)}, G^{(3)}$  denote the graphs depicted in Fig. 12a from left to right, respectively. First, we split  $V := \{1, \dots, 5\}$  into  $V_1 := \{1, 2, 3\}$  and  $V_2 := \{4, 5\}$ , and then split  $V_2$  into  $V_{2,1} := \{4\}$  and  $V_{2,2} := \{5\}$ . After exchanging parameters in  $G^{(1)}$ , nodes in  $V_1$  and nodes in  $V_2$  have the same parameter respectively. Then, after exchanging parameters in  $G^{(2)}$ , the average in  $V_1$ , that in  $V_{2,1}$ , and that in  $V_{2,2}$  become same as the average in  $V$ . Thus, by exchanging parameters in  $G^{(3)}$ , all nodes reach the exact consensus. Note that edge  $(4, 5)$  in  $G^{(3)}$ , which is added in line 27 in Alg. 2, is not necessary for all nodes to reach the exact consensus because nodes 4 and 5 already have the same parameter after exchanging parameters in  $G^{(2)}$ ; however, it is effective in decentralized learning as we explained in Sec. 4.2.

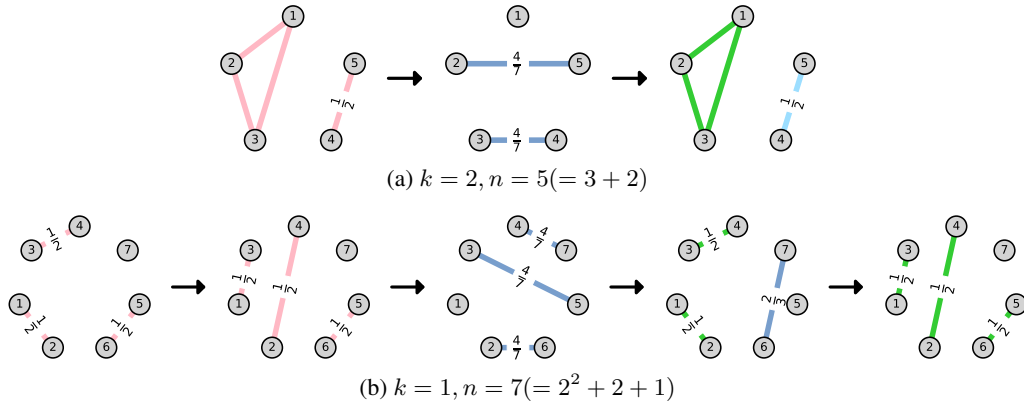

Figure 12: Illustration of the SIMPLE BASE- $(k + 1)$  GRAPH. The edge is colored in the same color as the line of Alg. 2 where the edge is added. The value on the edge indicates the edge weight. For simplicity, we omit the edge value when it is  $\frac{1}{3}$ .

### C.2 Illustrative Comparison between Simple Base- $(k + 1)$ and Base- $(k + 1)$ Graphs

In this section, we provide an example of the SIMPLE BASE- $(k + 1)$  GRAPH, explaining the reason why the length of the BASE- $(k + 1)$  GRAPH is less than that of the SIMPLE BASE- $(k + 1)$  GRAPH.

Let  $G^{(1)}, \dots, G^{(5)}$  denote the graphs depicted in Fig. 13 from left to right, respectively.  $(G^{(1)}, G^{(2)}, G^{(3)}, G^{(4)}, G^{(5)})$  is finite-time convergence, but  $(G^{(1)}, G^{(2)}, G^{(3)}, G^{(5)})$  is also finite-time convergence because after exchanging parameters in  $G^{(3)}$ , nodes 3 and 4 already have the same parameters. Then, using the technique proposed in Sec. 4.3, we can remove such unnecessary graphs contained in the SIMPLE BASE- $(k + 1)$  GRAPH (see Fig. 4a). Consequently, the BASE- $(k + 1)$  GRAPH can make all nodes reach the exact consensus faster than the SIMPLE BASE- $(k + 1)$  GRAPH.

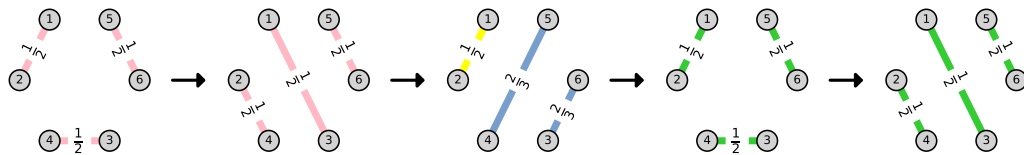

Figure 13: Illustration of the SIMPLE BASE-2 GRAPH with  $n = 6(= 2^2 + 2)$ . The edge is colored in the same color as the line of Alg. 2 where the edge is added.

### C.3 Additional Examples

#### C.3.1 Simple Base- $(k + 1)$ Graph

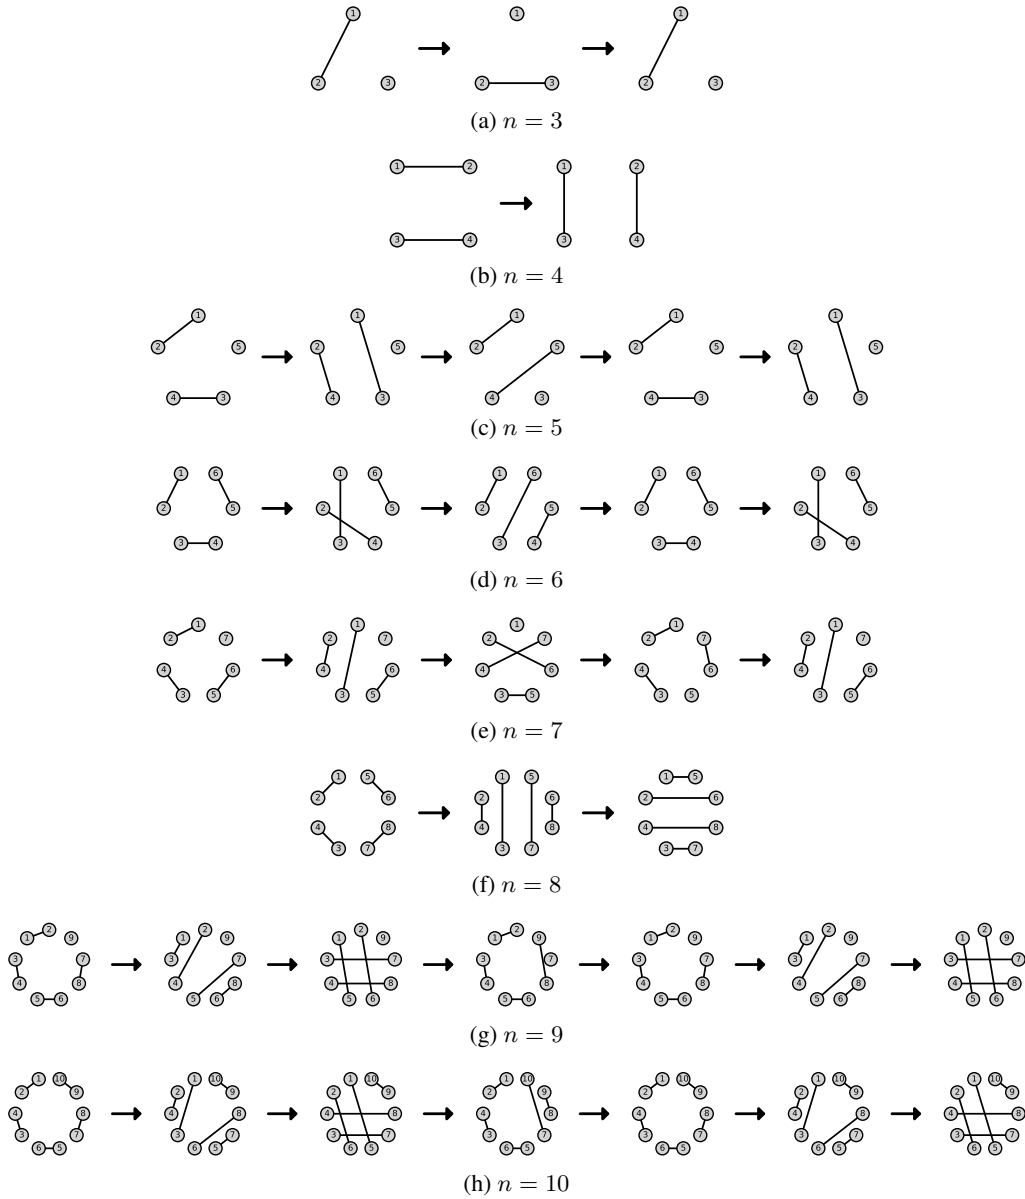

Figure 14: Illustration of the SIMPLE BASE-2 GRAPH with the various numbers of nodes.

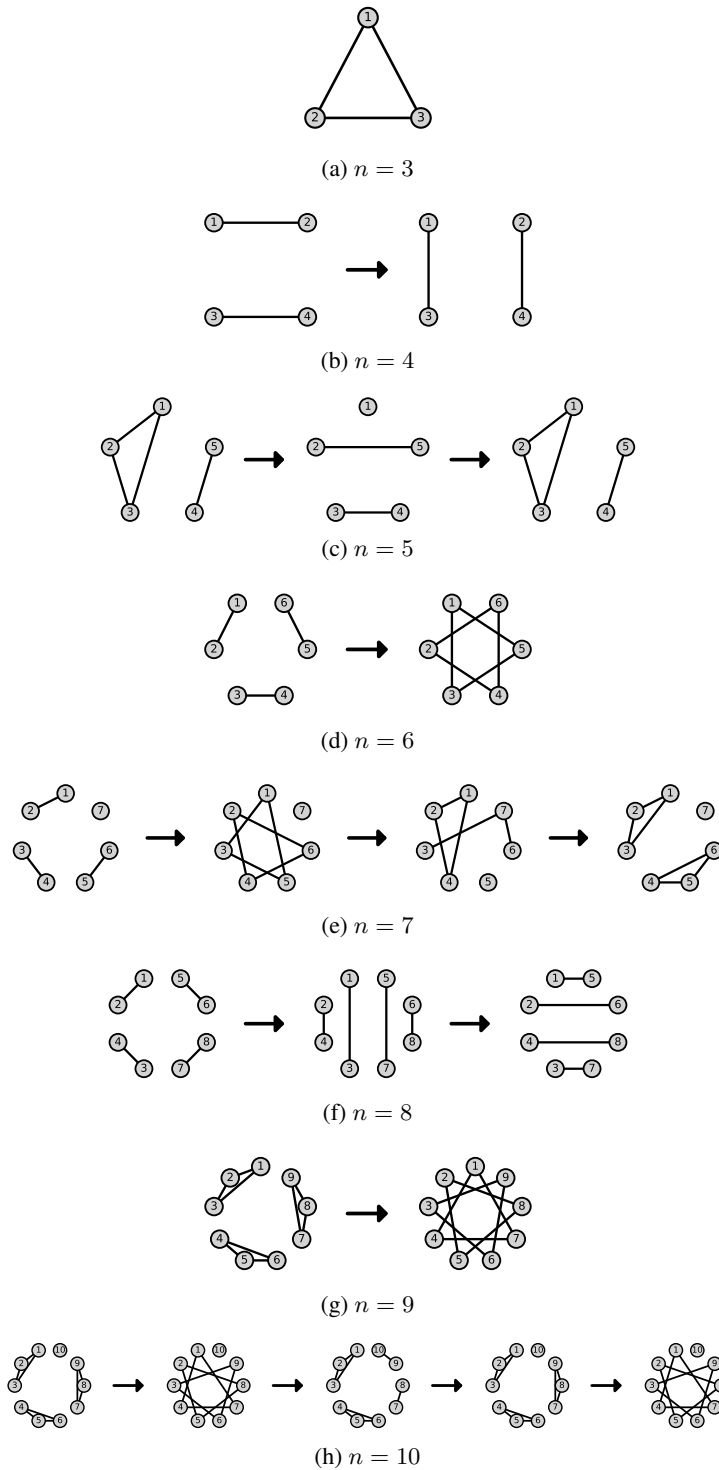

Figure 15: Illustration of the SIMPLE BASE-3 GRAPH with the various numbers of nodes.

### C.3.2 Base-( $k + 1$ ) Graph

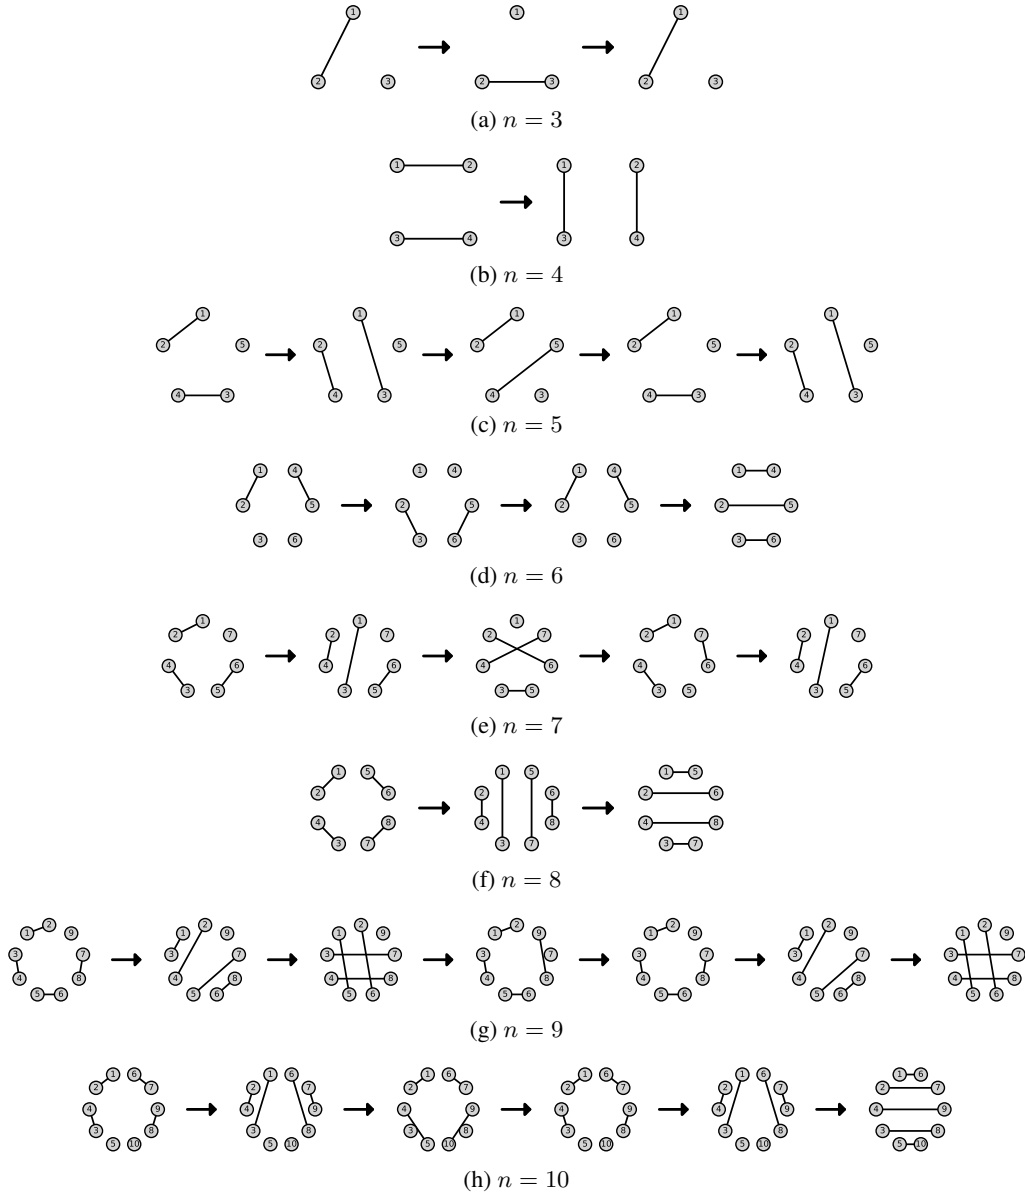

Figure 16: Illustration of the BASE-2 GRAPH with the various numbers of nodes.

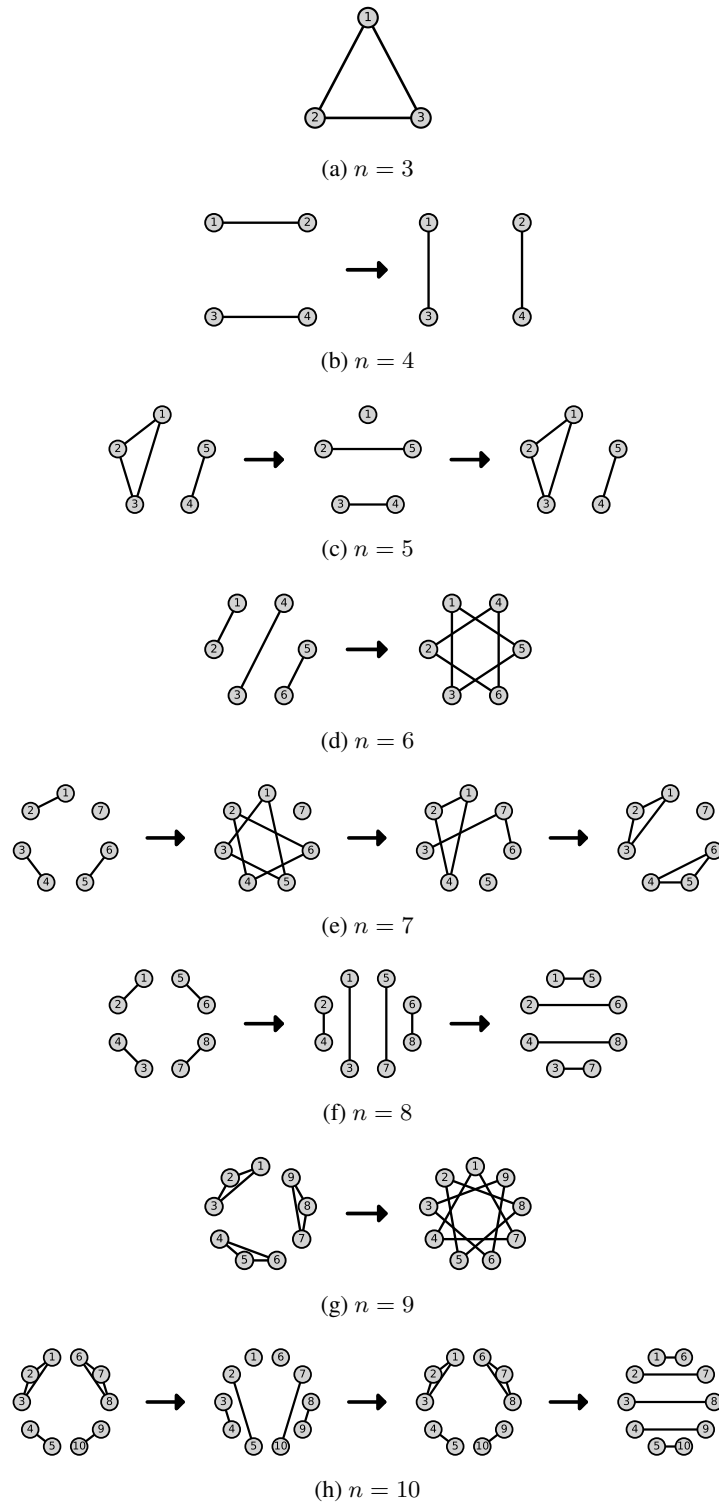

Figure 17: Illustration of the BASE-3 GRAPH with the various numbers of nodes.

### C.4 1-peer Hypercube Graph and 1-peer Exponential Graph

For completeness, we provide examples of the 1-peer hypercube [31] and 1-peer exponential graphs [43] in Figs. 19 and 18, respectively.

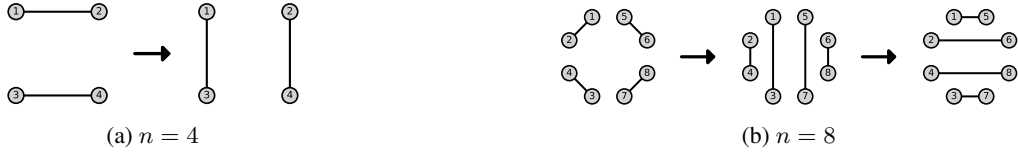

Figure 18: Illustration of the 1-peer hypercube graph. All edge weights are 0.5.

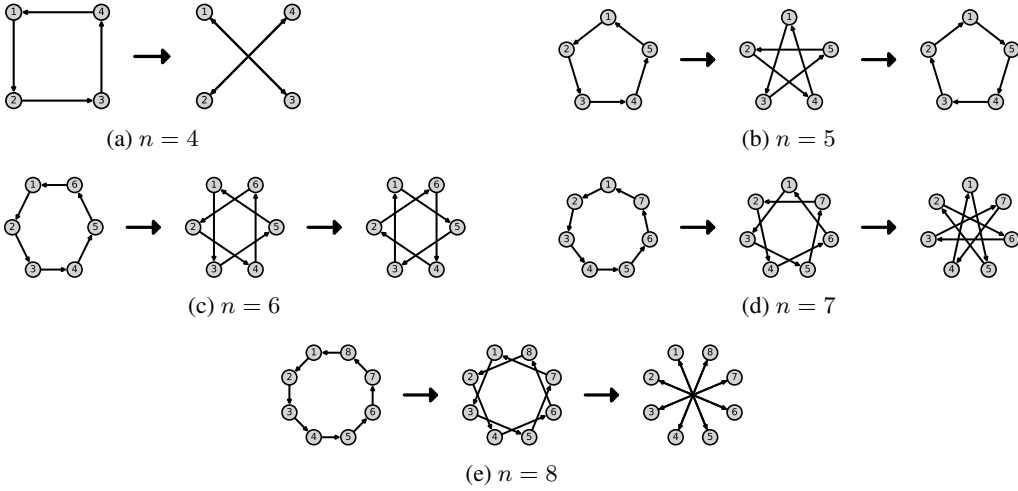

Figure 19: Illustration of the 1-peer exponential graph. All edge weights are 0.5.



## D Proof of Theorem 1

**Lemma 1** (Length of  $k$ -PEER HYPER-HYPERCUBE GRAPH). *Suppose that all prime factors of the number of nodes  $n$  are less than or equal to  $k + 1$ . Then, for any number of nodes  $n \in \mathbb{N}$  and maximum degree  $k \in [n - 1]$ , the length of the  $k$ -PEER HYPER-HYPERCUBE GRAPH is less than or equal to  $\max\{1, 2 \log_{k+2}(n)\}$ .*

*Proof.* We assume that  $n$  is decomposed as  $n = n_1 \times \cdots \times n_L$  with minimum  $L$  where  $n_l \in [k + 1]$  for all  $l \in [L]$ . Without loss of generality, we suppose  $n_1 \leq n_2 \leq \cdots \leq n_L$ . Then, for any  $i \neq j$ , it holds that  $n_i \times n_j \geq k + 2$  because if  $n_i \times n_j \leq k + 1$  for some  $i$  and  $j$ , this contradicts the assumption that  $L$  is minimum.

When  $L$  is even, we have

$$n = (n_1 \times n_2) \times \cdots \times (n_{L-1} \times n_L) \geq (k + 2)^{\frac{L}{2}}.$$

Then, we get  $L \leq 2 \log_{k+2}(n)$ .

Next, we discuss the case when  $L$  is odd. When  $L \geq 3$ ,  $n_L \geq \sqrt{k + 2}$  holds because  $n_{L-2} \times n_{L-1} \geq k + 2$ . Thus, we get

$$n = (n_1 \times n_2) \times \cdots \times (n_{L-2} \times n_{L-1}) \times n_L \geq (k + 2)^{\frac{L-1}{2}} \times n_L \geq (k + 2)^{\frac{L}{2}}.$$

Then, we get  $L \leq 2 \log_{k+2}(n)$  when  $L \geq 3$ .

Thus, given the case when  $L = 1$ , the length of the  $k$ -PEER HYPER-HYPERCUBE GRAPH is less than or equal to  $\max\{1, 2 \log_{k+2}(n)\}$ .  $\square$

**Lemma 2** (Length of SIMPLE BASE- $(k + 1)$  GRAPH). *For any number of nodes  $n \in \mathbb{N}$  and maximum degree  $k \in [n - 1]$ , the length of the SIMPLE BASE- $(k + 1)$  GRAPH is less than or equal to  $2 \log_{k+1}(n) + 2$ .*

*Proof.* When all prime factors of  $n$  are less than or equal to  $k + 1$ , the SIMPLE BASE- $(k + 1)$  GRAPH is equivalent to the  $k$ -PEER HYPER-HYPERCUBE GRAPH and the statement holds from Lemma 1. In the following, we consider the case when there exists a prime factor of  $n$  that is larger than  $k + 1$ . Note that because when  $L = 1$  (i.e.,  $n = a_1 \times (k + 1)^{p_1}$ ), all prime factors of  $n$  are less than or equal to  $k + 1$ , we only need to consider the case when  $L \geq 2$ . We have the following inequality:

$$\begin{aligned} \log_{k+1}(n) &= \log_{k+1}(a_1(k + 1)^{p_1} + \cdots + a_L(k + 1)^{p_L}) \\ &\geq p_1 + \log_{k+1}(a_1) \\ &\geq p_1. \end{aligned}$$

Then, because  $|V_1| = a_1 \times (k + 1)^{p_1}$ , it holds that  $m_1 = |\mathcal{H}_k(V_1)| \leq 1 + p_1 \leq \log_{k+1}(n) + 1$ . Similarly, it holds that  $|\mathcal{H}_k(V_{1,1})| = p_1 \leq \log_{k+1}(n)$  because  $|V_{1,1}| = (k + 1)^{p_1}$ . In Alg. 2, the update rule  $b_1 \leftarrow b_1 + 1$  in line 22 is executed for the first time when  $m = m_1 + 2$  because  $L \geq 2$ . Thus, the length of the SIMPLE BASE- $(k + 1)$  GRAPH is at most  $m_1 + |\mathcal{H}_k(V_{1,1})| + 1 \leq 2 \log_{k+1}(n) + 2$ . This concludes the statement.  $\square$

**Lemma 3** (Length of BASE- $(k + 1)$  GRAPH). *For any number of nodes  $n \in \mathbb{N}$  and maximum degree  $k \in [n - 1]$ , the length of the BASE- $(k + 1)$  GRAPH is less than or equal to  $2 \log_{k+1}(n) + 2$ .*

*Proof.* The statement follows immediately from Lemma 2 and line 12 in Alg. 3.  $\square$

## E Convergence Rate of DSGD over Various Topologies

Table 2 lists the convergence rates of DSGD over various topologies. These convergence rates can be immediately obtained from Theorem 2 stated in Koloskova et al. [11] and consensus rate of the topology. As seen from Table 2, the BASE-2 GRAPH enables DSGD to converge faster than the ring and torus and as fast as the exponential graph for any number of nodes, although the maximum degree of the BASE-2 GRAPH is only one. Moreover, for any number of nodes, the BASE- $(k + 1)$  GRAPH with  $2 \leq k < \lceil \log_2(n) \rceil$  enables DSGD to converge faster than the exponential graph, even though the maximum degree of the BASE- $(k + 1)$  GRAPH remains to be less than that of the exponential graph.

Table 2: Convergence rates and maximum degrees of DSGD over various topologies.

| Topology                                      | Convergence Rate                                                                                                                                                             | Maximum Degree            | #Nodes $n$                 |
|-----------------------------------------------|------------------------------------------------------------------------------------------------------------------------------------------------------------------------------|---------------------------|----------------------------|
| Ring [28]                                     | $\mathcal{O}\left(\frac{\sigma^2}{n\epsilon^2} + \frac{\zeta n^2 + \sigma n}{\epsilon^{3/2}} + \frac{n^2}{\epsilon}\right) \cdot LF_0$                                       | 2                         | $\forall n \in \mathbb{N}$ |
| Torus [28]                                    | $\mathcal{O}\left(\frac{\sigma^2}{n\epsilon^2} + \frac{\zeta n + \sigma\sqrt{n}}{\epsilon^{3/2}} + \frac{n}{\epsilon}\right) \cdot LF_0$                                     | 4                         | $\forall n \in \mathbb{N}$ |
| Exp. [43]                                     | $\mathcal{O}\left(\frac{\sigma^2}{n\epsilon^2} + \frac{\zeta \log_2(n) + \sigma\sqrt{\log_2(n)}}{\epsilon^{3/2}} + \frac{\log_2(n)}{\epsilon}\right) \cdot LF_0$             | $\lceil \log_2(n) \rceil$ | $\forall n \in \mathbb{N}$ |
| 1-peer Exp. [43]                              | $\mathcal{O}\left(\frac{\sigma^2}{n\epsilon^2} + \frac{\zeta \log_2(n) + \sigma\sqrt{\log_2(n)}}{\epsilon^{3/2}} + \frac{\log_2(n)}{\epsilon}\right) \cdot LF_0$             | 1                         | A power of 2               |
| 1-peer Hypercube [31]                         | $\mathcal{O}\left(\frac{\sigma^2}{n\epsilon^2} + \frac{\zeta \log_2(n) + \sigma\sqrt{\log_2(n)}}{\epsilon^{3/2}} + \frac{\log_2(n)}{\epsilon}\right) \cdot LF_0$             | 1                         | A power of 2               |
| <b>Base-<math>(k + 1)</math> Graph (ours)</b> | $\mathcal{O}\left(\frac{\sigma^2}{n\epsilon^2} + \frac{\zeta \log_{k+1}(n) + \sigma\sqrt{\log_{k+1}(n)}}{\epsilon^{3/2}} + \frac{\log_{k+1}(n)}{\epsilon}\right) \cdot LF_0$ | $k$                       | $\forall n \in \mathbb{N}$ |

## F Additional Experiments

### F.1 Comparison of Base- $(k + 1)$ and Simple Base- $(k + 1)$ Graphs

Fig. 20 shows the length of the SIMPLE BASE- $(k + 1)$  GRAPH and BASE- $(k + 1)$  GRAPH. The results indicate that for all  $k$ , the length of the BASE- $(k + 1)$  GRAPH is less than the length of the SIMPLE BASE- $(k + 1)$  GRAPH in many cases.

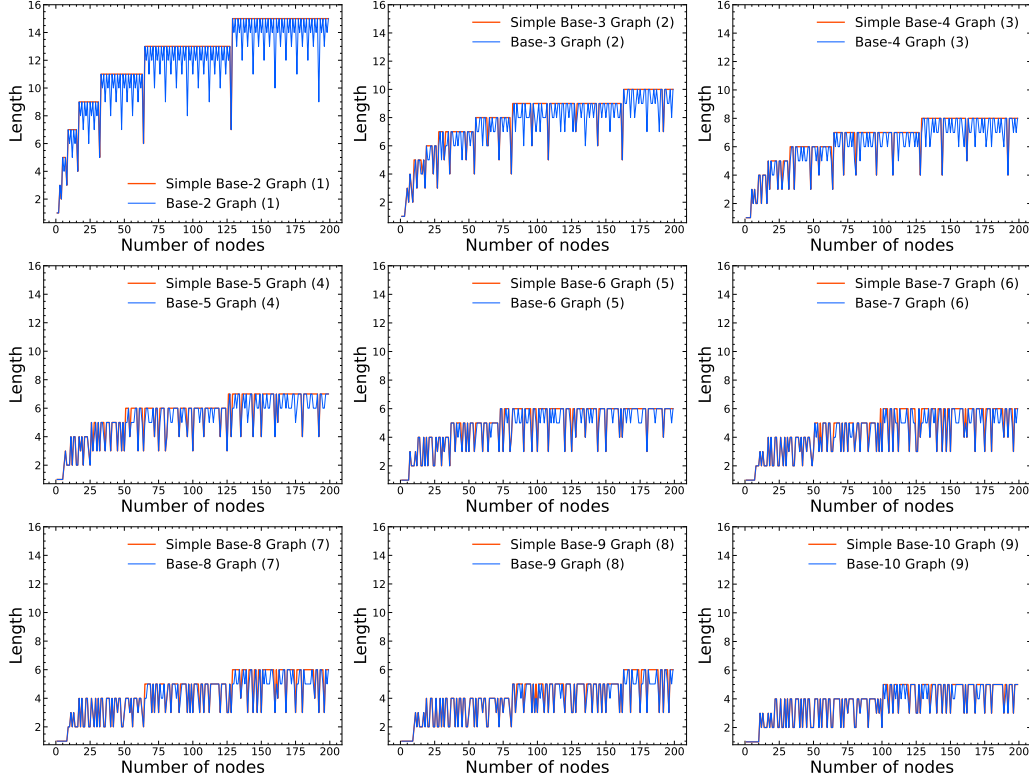

Figure 20: Comparison of the length of the SIMPLE BASE- $(k + 1)$  GRAPH and BASE- $(k + 1)$  GRAPH.

### F.2 Consensus Rate

In Fig. 21, we demonstrate how consensus error decreases on various topologies when the number of nodes  $n$  is a power of 2. The results indicate that the BASE-2 GRAPH and 1-peer exponential graph can reach the exact consensus after the same finite number of iterations and reach the consensus faster than other topologies. Note that the BASE-2 GRAPH is equivalent to the 1-peer hypercube graph when  $n$  is a power of 2.

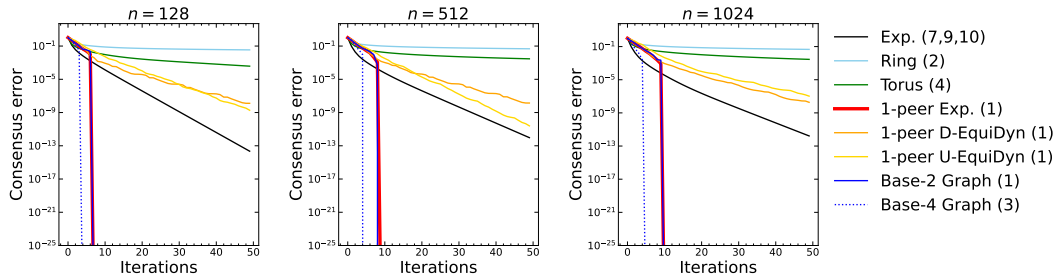

Figure 21: Comparison of consensus rates among different topologies when the number of nodes  $n$  is a power of 2. Because the BASE- $\{3, 5\}$  GRAPH are the same as the BASE- $\{2, 4\}$  GRAPH, respectively, when  $n$  is a power of 2, we omit the results of the BASE- $\{3, 5\}$  GRAPH.

### F.3 Decentralized Learning

#### F.3.1 Comparison of Base- $(k + 1)$ Graph and EquiStatic

In this section, we compared the BASE- $(k + 1)$  GRAPH with the  $\{U, D\}$ -EquiStatic [33]. The  $\{U, D\}$ -EquiStatic are dense variants of the 1-peer  $\{U, D\}$ -EquiDyn, and their maximum degree can be set as hyperparameters. We evaluated the  $\{U, D\}$ -EquiStatic varying their maximum degrees; the results are presented in Fig. 22. In both cases with  $\alpha = 10$  and  $\alpha = 0.1$ , the BASE-2 GRAPH can achieve comparable or higher final accuracy than all  $\{U, D\}$ -EquiStatic, and the BASE- $\{3, 4, 5\}$  GRAPH outperforms all  $\{U, D\}$ -EquiStatic. Thus, the BASE- $(k + 1)$  GRAPH is superior to the  $\{U, D\}$ -EquiStatic from the perspective of achieving a balance between accuracy and communication efficiency.

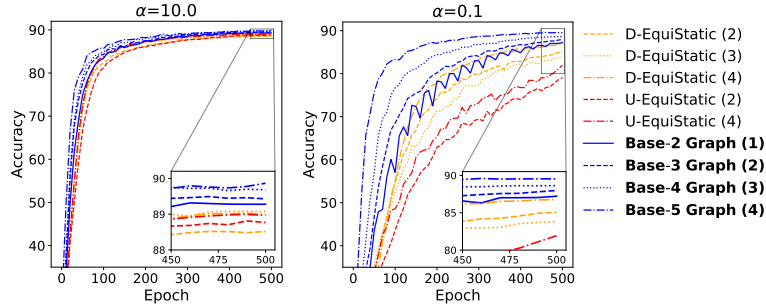

Figure 22: Test accuracy (%) of DSGD with CIFAR-10 and  $n = 25$ . The number in the bracket is the maximum degree of a topology.

#### F.3.2 Comparison with Various Number of Nodes

In this section, we evaluated the effectiveness of the BASE- $(k + 1)$  GRAPH when varying the number of nodes  $n$ . Fig. 24 presents the learning curves, and Fig 23 shows how consensus error decreases when  $n$  is 21, 22, 23, 24, and 25. From Fig. 24, the BASE-2 GRAPH consistently outperforms the 1-peer exponential graph and can achieve a final accuracy comparable to that of the exponential graph. Furthermore, the BASE- $\{3, 4, 5\}$  GRAPH can consistently outperform the exponential graph, even though the maximum degree of the BASE- $\{3, 4, 5\}$  GRAPH is less than that of the exponential graph.

In Fig. 25 presents the learning curve for  $n = 16$ . When the number of nodes is a power of two, the 1-peer exponential graph is also finite-time convergence, and the 1-peer exponential graph and BASE-2 GRAPH achieve competitive accuracy.

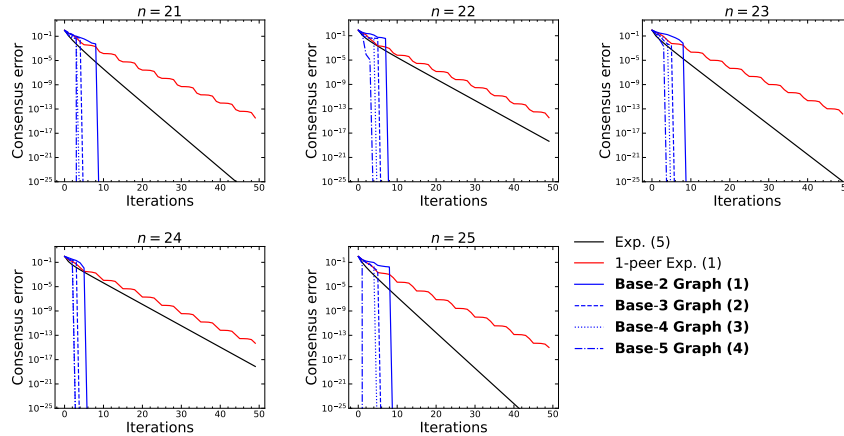

Figure 23: Comparison of consensus rates among different topologies. The number in the bracket denotes the maximum degree of a topology. We omit the results of the BASE-5 GRAPH when  $n = 24$  because the BASE-5 GRAPH and BASE-4 GRAPH are equivalent when  $n = 24$ .

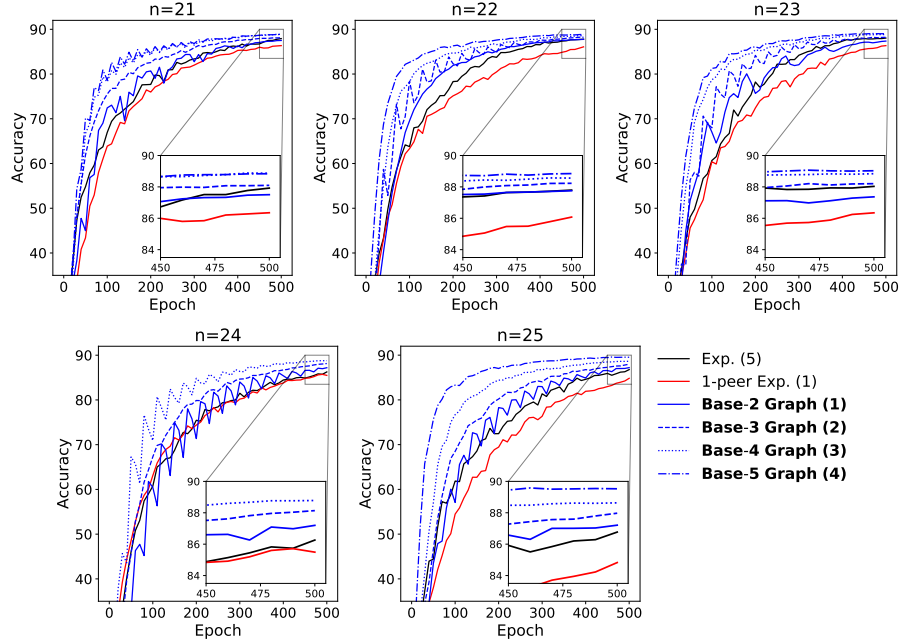

Figure 24: Test accuracy (%) of DSGD with CIFAR-10 and  $\alpha = 0.1$ . The number in the bracket denotes the maximum degree of a topology. We omit the results of the BASE-5 GRAPH when  $n = 24$  because the BASE-5 GRAPH and BASE-4 GRAPH are equivalent when  $n = 24$ .

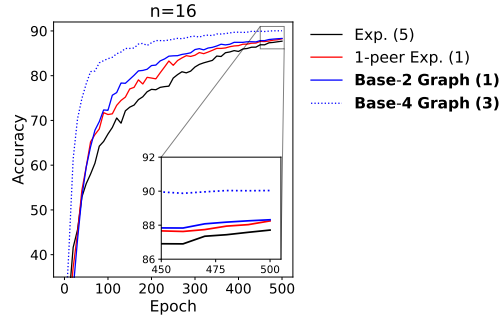

Figure 25: Test accuracy (%) of DSGD with CIFAR-10 and  $n = 16$ . The number in the bracket is the maximum degree of a topology. We omit the results of the BASE-3 GRAPH and BASE-5 GRAPH because these graphs are equivalent to the BASE-2 GRAPH and BASE-4 GRAPH, respectively.
